# Supplementary material for: A Reduction in Selenoprotein S Amplifies the Inflammatory Profile of Fast-Twitch Skeletal Muscle in themdxDystrophic Mouse
Source: Hindawi journal article supplement (doi:10.1155/2017/7043429), 2017-01-01
Supplement: f2 [file 7043429.f2.pdf]

**Supplementary Table 1: Mouse Primers Used for qPCR.** Cluster of differentiation 68 (Cd68), cluster of differentiation 163 (Cd163), EGF-like module-containing mucin-like hormone receptor-like 1 (F4/80), glyceraldehyde 3-phosphate dehydrogenase (Gapdh), glucose-regulated protein 78 (Grp78), interleukin 18 (Il-18), inducible nitric oxide (iNos), monocyte chemoattractant protein 1 (Mcp-1), myeloperoxidase (Mpo), transforming growth factor  $\beta$ 1 (Tgf- $\beta$ 1), tumour necrosis factor  $\alpha$  (Tnf $\alpha$ ).

| Gene                           | GenBank<br>Accession | Forward Primer<br>(5' to 3') | Reverse Primer<br>(5' to 3') |
|--------------------------------|----------------------|------------------------------|------------------------------|
| <i>Arginase</i>                | NC_000076.6          | GGAACCCAGAGAGAGCATGA         | TTTTCCAGCAGACCAGCTT          |
| <i>Caspase 3</i>               | NC_000074.6          | GGGCCTGTTGAACTGAAAAA         | CCGTCCTTTGAATTTCTCCA         |
| <i>Cd68</i>                    | NC_000077.6          | GGCCAAGCTATTGCGACATG         | CCGAACACAGCGTAGATAGAC        |
| <i>Cd163</i>                   | NC_000072.6          | GGGTCATTGAGAGGCACACTG        | CTGGCTGTCCTGTCAAGGCT         |
| <i>F4/80</i>                   | NC_000083.6          | AAGCATCCGAGACACACACA         | GGCAAGACATACCAGGGAGA         |
| <i>Gapdh</i>                   | NC_000072.6          | GTGTTCTACCCCAATGTA           | AGGAGACAACCTGGTCCTCA         |
| <i>Grp78</i>                   | NC_000068.7          | TTCCTGCGTCGGTGTATTCA         | GCGGTTGCCCTGATCGT            |
| <i>Il-18</i>                   | NC_000068.7          | GGGCCTCAAAGGAAAGAATC         | TACCAGTTGGGGAACTCTGC         |
| <i>iNos</i>                    | NC_000077.6          | CCCCAAAGGGATGAGAAGTT         | GGTCTGGGCCATAGAACTGA         |
| <i>Mcp-1</i>                   | NC_000077.6          | CCCAATGAGTAGGCTGGAGA         | TCTGGACCCATTCTTCTTG          |
| <i>Mpo</i>                     | NC_000077.6          | AACATGCAGCGCAGCCGG           | AGCCCACAAAAGCGTCTC           |
| <i>Tgf-<math>\beta</math>1</i> | NC_000073.6          | TGGAGCAACATGTGGAATC          | GTCAGCAGCCGGTTACCA           |
| <i>Tnf<math>\alpha</math></i>  | NC_000083.6          | CCCCAAAGGGATGAGAAGTT         | GGTCTGGGCCATAGAACTGA         |
