# Supplementary material for: A Reduction in Selenoprotein S Amplifies the Inflammatory Profile of Fast-Twitch Skeletal Muscle in themdxDystrophic Mouse
Source: Hindawi journal article supplement (doi:10.1155/2017/7043429), 2017-01-01
Supplement: f3 [file 7043429.f3.pdf]

a) Soleus Specific Force Production

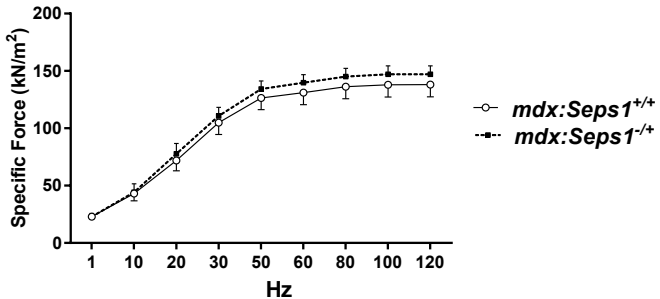

b) Soleus Fatigue and Recovery

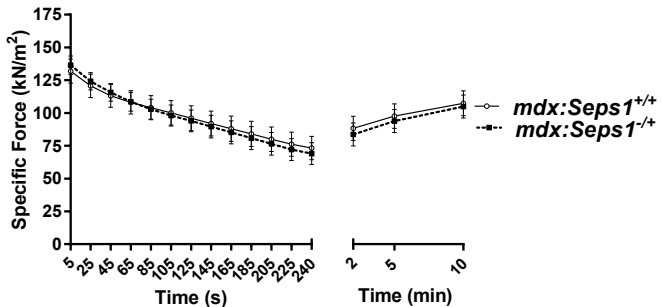

**Supplementary Figure 1: Ex vivo strength and fatigue analysis of the soleus.** (a) Force Frequency curve of the soleus muscle in response to ex vivo stimulation, and (b) specific force production of the soleus during a four minute submaximal fatiguing stimulation, and force recovery at 2, 5 and 10 minutes (n=11).
